# Supplementary material for: Structural diversity in organically templated uranium sulfatesElectronic supplementary information (ESI) available: three-dimensional packing diagrams for USO-6–USO-10. See http://www.rsc.org/suppdata/dt/b2/b209208e/
Source: Royal Society of Chemistry journal article supplement (doi:10.1039/b209208e), 2003-02-12
Supplement: b209208e-2.pdf [file b209208e-2.pdf]

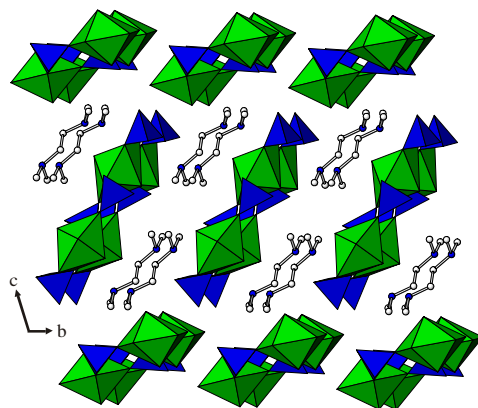

Figure S2. Three-dimensional packing of USO-7. Blue tetrahedra and green pentagonal bipyramids represent  $[\text{SO}_4]$  and  $[\text{UO}_7]$  respectively. Blue and white circles represent nitrogen and carbon atoms. Hydrogen atoms have been removed for clarity.

A. J. Norquist, M. B. Doran, P. M. Thomas and D. O'Hare
